# Supplementary material for: Target-Induced Aggregation of Gold Nanoparticles for Colorimetric Detection of Bisphenol A
Source: Hindawi journal article supplement (doi:10.1155/2019/3676384), 2019-09-08
Supplement: f1 [file 3676384.f1.docx]

**Supplementary Materials**

**Target-induced aggregation of gold nanoparticles for colorimetric detection of bisphenol A**

Sung Hyun Hwang,1,# Sehan Jeong,1,# Hyung Joo Choi,1 Hyunmin Eun,1 Min Geun Jo,1 Woo Young Kwon,1 Seokjoon Kim,1 Yong Hwan Kim,2 Miran Lee,2 and Ki Soo Park1,*

1 Department of Biological Engineering, College of Engineering, Konkuk University, Seoul 05029, Republic of Korea

2 Daisung Green Tech, Gyeonggi-do 13216, Republic of Korea

# These authors equally contributed to this work.

* To whom correspondence should be addressed.

E-mail: [kskonkuk@gmail.com](mailto:kskonkuk@gmail.com) and [akdong486@konkuk.ac.kr](mailto:akdong486@konkuk.ac.kr); Phone: +82-2-450-3742; Fax: +82-2-450-3742

**Table S1.** Comparison of this method with other methods for detection of BPA.

| **Key principle** | **Linear range** | **LOD** | **Ref** |
| --- | --- | --- | --- |
| Colorimetry  (Au-Fe alloy nanoparticle) | 1.1 to 70.1 μM | 580 nM | [S3] |
| Electrochemistry  (Imprinted polymers and AuNPs) | 8 μM to 60 mM | 140 nM | [S4] |
| SERS  (Self-assembled graphitic substrates) | 1 μM to 100mM | 1000 nM | [S5] |
| Electrochemistry  (AuNPs) | 0.01 to 10 μM | 5 nM | [S6] |
| Colorimetry  (silver nanoparticles) | 1 to 100 μM | 450 nM | [S7] |
| Colorimetry  (CTAB & AuNPs) | 0.5 to 50 μM | 97 nM | This work |

**Table S2.** Determination of BPA in tap water.

| **Amount of BPA added (μM)** | **Mean BPA concentration (μM)a** | **SDb** | **CVc** | **Recoveryd** |
| --- | --- | --- | --- | --- |
| 5.00 | 4.74 | 0.067 | 1.42 | 94.8 |
| 15.0 | 14.8 | 0.639 | 4.32 | 98.5 |

a Mean of three measurements.

b Standard deviation (SD) of three measurements.

c Coefficient of variation (CV) = (SD/mean) × 100 (%)

d Recovery = (mean/amount added) × 100 (%)


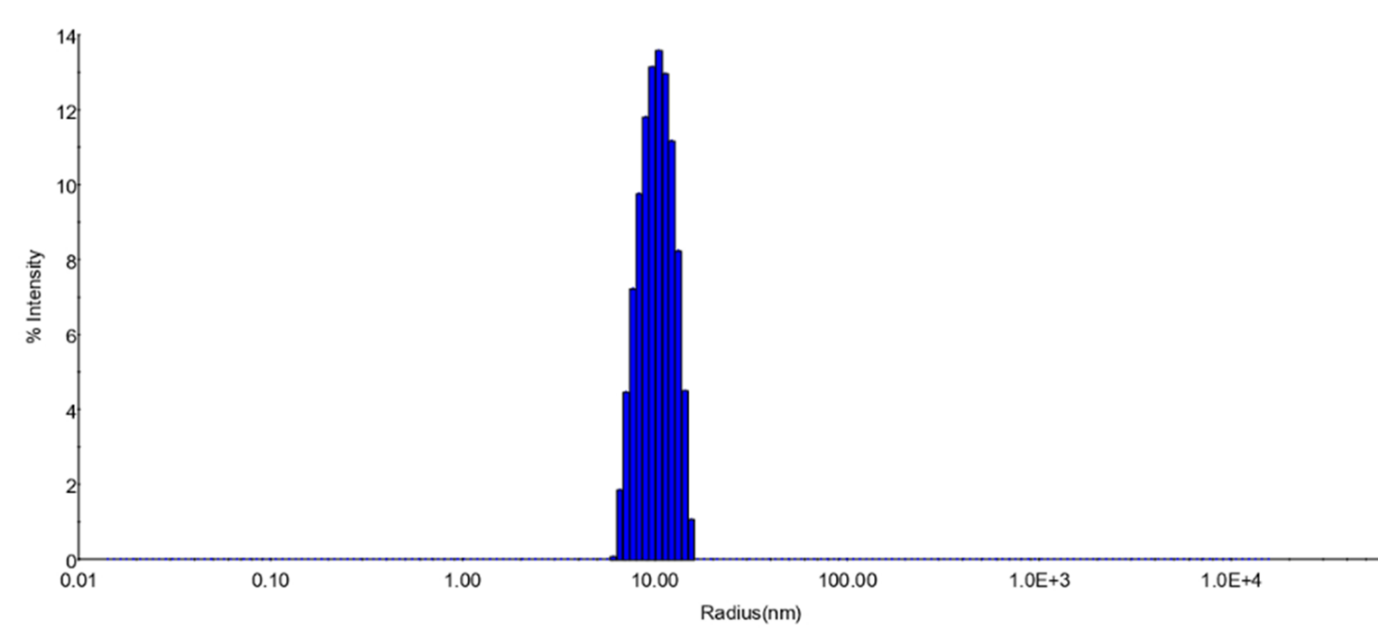


**Figure S1.** Size distribution of the prepared AuNPs. It exhibits a radius of 10 nm with the uniform size distribution, which is evidenced by the % polydispersity of 19% [S1,S2].

**
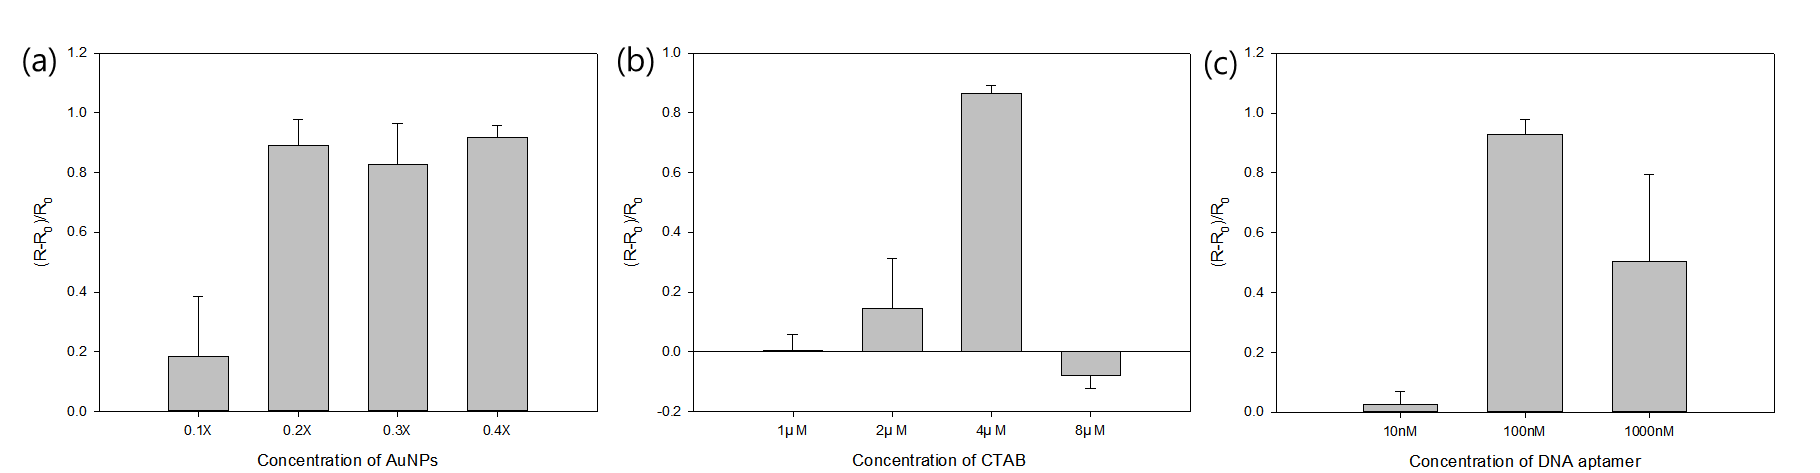
**

**Figure S2.** Optimization of the concentrations of AuNPs (a), CTAB (b), and DNA aptamer (c). For the quantitative comparison, we defined (R-R0)/R0, where R0 and R are the A650/A520 in the absence and presence of BPA (50 µM), respectively. In (a), concentration of AuNPs (4.42 x 1012 particles/mL) is denoted as “1X”. The final concentrations of CTAB and DNA aptamer were 4 µM and 100 nM, respectively, and in (b), the final concentrations of AuNPs and DNA aptamer were 0.2X and 100 nM, respectively, and in (c), the final concentration of AuNPs and CTAB were 0.2X and 4 µM, respectively.

**Figure S3**. Optimization of the types of surfactants. For the quantitative comparison, we defined (R-R0)/R0, where R0 and R are the A650/A520 in the absence and presence of BPA (50 µM), respectively. CTAB, DTAB, and CPC (4 µM) are the cationic surfactants, while SDS (4 µM) is the anionic surfactant. The final concentrations of AuNPs and DNA aptamer were 0.2X and 100 nM, respectively.


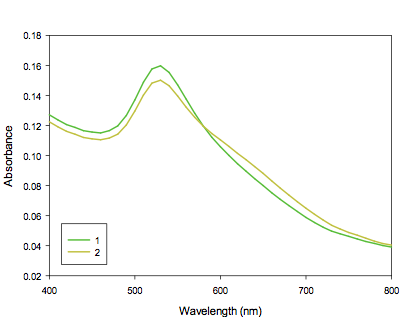


**Figure S4.** Absorbance spectra of the control sample solutions (1: with BPA and 2: without BPA). The final concentrations of AuNPs, control DNA, and CTAB were 0.2X, 100 nM, and 4 µM, respectively.

**Figure S5.** Linear relationship between A650/A520 and the concentration of BPA in tap water (10%).

**Figure S6.** Standard addition method used for the determination of BPA in a receipt solution. Because the developed system in distilled water exhibited the background A650/A520 ratio of 0.4703 (A650/A520 distilled water), we subtracted it from those measured in the receipt (A650/A520 receipt). The resulting ΔA650/A520 (A650/A520 receipt - A650/A520 distilled water)was then utilized for the determination of CBPA present in the receipt. The final concentrations of AuNPs, CTAB, and DNA aptamer are 0.2X, 4 µM, and 100 nM, respectively.

**References**

[S1] S. M. Patil, D. A Keire, K. Chen, “Comparison of NMR and Dynamic Light Scattering for Measuring Diffusion Coefficients of Formulated Insulin: Implications for Particle Size Distribution Measurements in Drug Products,” *The APS journal*, vol. 19, no. 6, pp. 1760-1766, 2017.

[S2] G. E. Borgstahl, “How to Use Dynamic Light Scattering to Improve the Likelihood of Growing Macromolecular Crystals,” *Methods in Molecular Biology*, vol.363, pp. 109-129, 2007.

[S3] X. Liang, H. Wang, H. Wang and G. Pei, “Colorimetric detection of bisphenol a using Au-Fe alloy nanoparticle aggregation,” *Analytical Methods*, vol. 7, pp. 3952-3957, 2015.

[S4] L. Zhu, Y. Cao, G. Cao, “Electrochemical sensor for bisphenol A detection based on molecularly imprinted polymers and gold nanoparticles,” *Biosensors and bioelectronics*, vol. 54, pp. 258-261, 2014.

[S5] P. Y. Lin, C. W. Hsieh, S. Hsieh, “Rapid and Sensitive SERS Detection of Bisphenol A Using Self-assembled Graphitic Substrates,” *Scientific reports*, vol. 7, no. 1, pp. 16698, 2017.

[S6] L. Zhou, J. Wang, D. Li, Y. Li, “An electrochemical aptasensor based on gold nanoparticles dotted graphene modified glassy carbon electrode for label-free detection of bisphenol A in milk samples,” *Food chemistry*, vol. 162, pp. 34-40, 2014

[S7] S. Khalililaghab, S. Momeni, M. Farrokhnia, I. Nabipour, S. Karimi, “Development of a new colorimetric assay for detection of bisphenol-A in aqueous media using green synthesized silver chloride nanoparticles: experimental and theoretical study,” *Analytical and bioanalytical chemistry*, vol. 409, no. 11, pp. 2847-2858, 2017.
